# Supplementary material for: Composition and Dynamics of H1N1 and H7N9 Influenza A Virus Quasispecies in a Co-infected Patient Analyzed by Single Molecule Sequencing Technology
Source: Front Genet. 2021 Nov 3;12:754445. doi: 10.3389/fgene.2021.754445 (PMC8595946; doi:10.3389/fgene.2021.754445)
Supplement: Supplementary file 1 [file Table2.XLSX]

## Sheet: Sheet1
Table S2. The rates and types of sequening error bases.
Number	Group name a	Sequences b	Bases c	Error bases d	Types of error bases e
					Insertion	Deletion	Mismatch
1	S2.H1N1.MP	4354	4472618	6400(0.14%)	1058(16.53%)	928(14.50%)	4414(68.97%)
2	S5.H1N1.MP	3888	3993516	5524(0.14%)	540(9.78%)	1293(23.41%)	3691(66.82%)
3	S5.H1N1.NS	3833	3411787	5120(0.15%)	417(8.14%)	1107(21.62%)	3596(70.23%)
4	S2.H1N1.NS	3423	3047167	4386(0.14%)	697(15.89%)	764(17.42%)	2925(66.69%)
5	S2.H1N1.NP	2494	3903968	5267(0.13%)	854(16.21%)	907(17.22%)	3506(66.57%)
6	S2.H1N1.NA	2107	3072744	3862(0.13%)	734(19.01%)	563(14.58%)	2565(66.42%)
7	S3.H1N1.NA	1335	1946703	2574(0.13%)	273(10.61%)	400(15.54%)	1901(73.85%)
8	S2.H1N1.HA	1295	2301887	3722(0.16%)	670(18.00%)	764(20.53%)	2288(61.47%)
9	S3.H1N1.MP	1286	1320880	1740(0.13%)	158(9.08%)	211(12.13%)	1371(78.79%)
10	S3.H1N1.NP	1166	1824975	2439(0.13%)	185(7.59%)	318(13.04%)	1936(79.38%)
11	S5.H1N1.NP	1155	1807769	2470(0.14%)	194(7.85%)	393(15.91%)	1883(76.23%)
12	S6.H1N1.MP	898	922321	1349(0.15%)	75(5.56%)	134(9.93%)	1140(84.51%)
13	S3.H1N1.NS	846	753002	1072(0.14%)	62(5.78%)	116(10.82%)	894(83.40%)
14	S1.H1N1.MP	827	849428	1368(0.16%)	97(7.09%)	211(15.42%)	1060(77.49%)
15	S4.H1N1.MP	825	847363	1068(0.13%)	88(8.24%)	117(10.96%)	863(80.81%)
16	S5.H1N1.NA	781	1138862	1924(0.17%)	164(8.52%)	378(19.65%)	1382(71.83%)
17	S6.H1N1.NP	666	1042388	1642(0.16%)	98(5.97%)	216(13.15%)	1328(80.88%)
18	S1.H7N9.MP	655	672754	1143(0.17%)	69(6.04%)	151(13.21%)	923(80.75%)
19	S4.H1N1.HA	619	1100143	1735(0.16%)	180(10.37%)	299(17.23%)	1256(72.39%)
20	S4.H1N1.NA	588	857390	1221(0.14%)	86(7.04%)	136(11.14%)	999(81.82%)
21	S1.H1N1.NS	558	496681	906(0.18%)	61(6.73%)	117(12.91%)	728(80.35%)
22	S4.H1N1.NS	549	488656	746(0.15%)	46(6.17%)	87(11.66%)	613(82.17%)
23	S5.H1N1.HA	538	956184	1945(0.20%)	158(8.12%)	490(25.19%)	1297(66.68%)
24	S4.H1N1.NP	494	773152	1093(0.14%)	42(3.84%)	101(9.24%)	950(86.92%)
25	S1.H1N1.NP	439	687132	1185(0.17%)	97(8.19%)	174(14.68%)	914(77.13%)
26	S1.H7N9.NS	421	374762	717(0.19%)	72(10.04%)	90(12.55%)	555(77.41%)
27	S7.H1N1.MP	372	382060	672(0.18%)	16(2.38%)	67(9.97%)	589(87.65%)
28	S3.H1N1.PB2	335	784314	1275(0.16%)	79(6.20%)	199(15.61%)	997(78.20%)
29	S6.H1N1.NA	322	469507	756(0.16%)	31(4.10%)	54(7.14%)	671(88.76%)
30	S3.H1N1.PA	316	705713	1128(0.16%)	85(7.54%)	189(16.76%)	854(75.71%)
31	S1.H7N9.HA	304	526623	1054(0.20%)	95(9.01%)	137(13.00%)	822(77.99%)
32	S1.H1N1.HA	288	511863	1067(0.21%)	87(8.15%)	225(21.09%)	755(70.76%)
33	S1.H1N1.NA	282	411217	725(0.18%)	61(8.41%)	92(12.69%)	572(78.90%)
34	S2.H1N1.PB2	280	655672	1235(0.19%)	192(15.55%)	166(13.44%)	877(71.01%)
35	S1.H7N9.NP	280	438257	796(0.18%)	57(7.16%)	109(13.69%)	630(79.15%)
36	S7.H1N1.NS	279	248313	419(0.17%)	3(0.72%)	37(8.83%)	379(90.45%)
37	S1.H7N9.NA	236	340820	588(0.17%)	36(6.12%)	60(10.20%)	492(83.67%)
38	S3.H1N1.HA	231	410539	733(0.18%)	52(7.09%)	128(17.46%)	553(75.44%)
39	S6.H1N1.HA	226	401636	721(0.18%)	34(4.72%)	119(16.50%)	568(78.78%)
40	S6.H1N1.NS	217	193142	332(0.17%)	12(3.61%)	14(4.22%)	306(92.17%)
41	S7.H7N9.NS	137	121934	204(0.17%)	4(1.96%)	18(8.82%)	182(89.22%)
42	S7.H1N1.NP	132	206596	327(0.16%)	16(4.89%)	23(7.03%)	288(88.07%)
43	S7.H7N9.NP	112	175291	306(0.17%)	11(3.59%)	26(8.50%)	269(87.91%)
44	S1.H1N1.PB2	94	220100	434(0.20%)	46(10.60%)	61(14.06%)	327(75.35%)
45	S4.H1N1.PA	89	198758	325(0.16%)	21(6.46%)	49(15.08%)	255(78.46%)
46	S3.H1N1.PB1	88	206023	343(0.17%)	15(4.37%)	51(14.87%)	277(80.76%)
47	S2.H1N1.PA	83	185392	329(0.18%)	53(16.11%)	55(16.72%)	221(67.17%)
48	S5.H7N9.MP	73	74976	113(0.15%)	5(4.42%)	12(10.62%)	96(84.96%)
49	S7.H7N9.MP	71	72920	121(0.17%)	3(2.48%)	11(9.09%)	107(88.43%)
50	S5.H7N9.NP	69	107995	161(0.15%)	10(6.21%)	19(11.80%)	132(81.99%)
51	S1.H7N9.PB2	62	145179	279(0.19%)	37(13.26%)	30(10.75%)	212(75.99%)
52	S2.H1N1.PB1	59	138140	274(0.20%)	21(7.66%)	63(22.99%)	190(69.34%)
53	S1.H1N1.PA	53	118370	253(0.21%)	21(8.30%)	49(19.37%)	183(72.33%)
54	S1.H7N9.PA	32	71483	149(0.21%)	27(18.12%)	20(13.42%)	102(68.46%)
55	S5.H1N1.PB2	22	51509	102(0.20%)	7(6.86%)	12(11.76%)	83(81.37%)
56	S7.H1N1.HA	22	39096	73(0.19%)	2(2.74%)	7(9.59%)	64(87.67%)
57	S8.H1N1.MP	22	22594	36(0.16%)	0(0.00%)	1(2.78%)	35(97.22%)
58	S1.H7N9.PB1	20	46827	80(0.17%)	7(8.75%)	15(18.75%)	58(72.50%)
a: The group is named by sample, subtype and genomic segment.
b: The number of sequences in one group.
c: The number of bases in one group.
d: The number and rate of sequencing error bases.
e: The number and proportion of three types of sequencing error bases.
