# Supplementary material for: Composition and Dynamics of H1N1 and H7N9 Influenza A Virus Quasispecies in a Co-infected Patient Analyzed by Single Molecule Sequencing Technology
Source: Front Genet. 2021 Nov 3;12:754445. doi: 10.3389/fgene.2021.754445 (PMC8595946; doi:10.3389/fgene.2021.754445)
Supplement: Supplementary file 3 [file Table4.XLSX]

## Sheet: H1N1.HA
Table S4.1. Haplotypes of HA sequences for H1N1.
Haplotype	Loci and bases		Abundance of haplotype in each sample a
	86	697	S1	S2	S3	S4	S5	S6	S7	S8	Total b
hap_1	C	G	288(100%)	1295(100%)	231(100%)	471(76.09%)	538(100%)	99(43.81%)	22(100%)	0	2994
hap_2	A	G	0	0	0	148(23.91%)	0	0	0	0	148
hap_3	C	A	0	0	0	0	0	127(56.19%)	0	0	127
a: The number and percentage of haplotype in each sample.
b: The number of haplotypes in all samples.

## Sheet: H1N1.NA
Table S4.2. Haplotypes of NA sequences for H1N1.
Haplotype	Loci and bases				Abundance of haplotype in each sample
	147	630	640	843	S1	S2	S3	S4	S5	S6	S7	S8	Total
hap_1	C	G	A	C	282(100%)	980(46.51%)	1228(91.99%)	460(78.23%)	710(90.91%)	322(100%)	0	0	3982
hap_2	C	G	A	T	0	1119(53.11%)	0	0	71(9.09%)	0	0	0	1190
hap_3	A	G	G	C	0	0	0	126(21.43%)	0	0	0	0	126
hap_4	C	A	A	C	0	0	107(8.01%)	0	0	0	0	0	107
hap_5	C	G	G	T	0	8(0.38%)	0	0	0	0	0	0	8
hap_6	C	G	G	C	0	0	0	1(0.17%)	0	0	0	0	1
hap_7	A	G	A	C	0	0	0	1(0.17%)	0	0	0	0	1

## Sheet: H1N1.NP
Table S4.3. Haplotypes of NP sequences for H1N1.
Haplotype	Loci and bases		Abundance of haplotype in each sample
	133	237	S1	S2	S3	S4	S5	S6	S7	S8	Total
hap_1	C	G	439(100%)	2494(100%)	1128(96.74%)	339(68.62%)	1092(94.55%)	666(100%)	132(100%)	0	6290
hap_2	A	G	0	0	0	155(31.38%)	0	0	0	0	155
hap_3	G	A	0	0	38(3.26%)	0	63(5.45%)	0	0	0	101

## Sheet: H1N1.M
Table S4.4. Haplotypes of HA sequences for H1N1.
Haplotype	Loci and bases		Abundance of haplotype in each sample
	427	835	S1	S2	S3	S4	S5	S6	S7	S8	Total
hap_1	C	G	827(100%)	4022(92.37%)	1090(84.76%)	803(97.33%)	3668(94.34%)	898(100%)	372(100%)	22(100%)	11702
hap_2	A	G	0	332(7.63%)	196(15.24%)	22(2.67%)	113(2.91%)	0	0	0	663
hap_3	G	A	0	0	0	0	107(2.75%)	0	0	0	107

## Sheet: H1N1.NS
Table S4.5. Haplotypes of NS sequences for H1N1.
Haplotype	Loci and bases		Abundance of haplotype in each sample
	260	705	S1	S2	S3	S4	S5	S6	S7	S8	Total
hap_1	A	G	558(100%)	3404(99.44%)	768(90.78%)	549(100%)	3716(96.95%)	217(100%)	279(100%)	0	9491
hap_2	G	G	0	19(0.56%)	78(9.22%)	0	17(0.44%)	0	0	0	114
hap_3	A	A	0	0	0	0	100(2.61%)	0	0	0	100

## Sheet: H7N9.PB2
Table S4.6. Haplotypes of PB2 sequences for H7N9.
Haplotype	Loci and bases			Abundance of haplotype in each sample
	1906	2080	2286	S1	S2	S3	S4	S5	S6	S7	S8	Total
hap_1	A	G	A	21(33.87%)	0	0	0	0	0	0	0	21
hap_2	G	G	A	17(27.42%)	4(100%)	0	0	0	0	0	0	21
hap_3	A	G	G	14(22.58%)	0	0	0	0	0	0	0	14
hap_4	G	A	A	10(16.13%)	0	0	0	0	0	0	0	10

## Sheet: H7N9.HA
Table S4.7. Haplotypes of HA sequences for H7N9.
Haplotype	Loci and bases		Abundance of haplotype in each sample
	722	1163	S1	S2	S3	S4	S5	S6	S7	S8	Total
hap_1	G	A	157(51.64%)	0	0	0	0	0	8(100%)	0	165
hap_2	G	G	104(34.21%)	0	0	0	0	0	0	0	104
hap_3	A	A	43(14.14%)	0	0	0	0	0	0	0	43

## Sheet: H7N9.NA
Table S4.8. Haplotypes of NA sequences for H7N9.
Haplotype	Loci and bases			Abundance of haplotype in each sample
	339	448	1312	S1	S2	S3	S4	S5	S6	S7	S8	Total
hap_1	A	A	A	94(39.83%)	0	0	0	0	0	0	0	94
hap_2	A	A	G	70(29.66%)	0	0	0	0	0	0	0	70
hap_3	C	A	A	45(19.07%)	0	0	0	0	0	5(100%)	0	50
hap_4	C	G	A	24(10.17%)	0	0	0	0	0	0	0	24
hap_5	C	A	G	1(0.42%)	0	0	0	0	0	0	0	1
hap_6	A	G	G	1(0.42%)	0	0	0	0	0	0	0	1
hap_7	C	G	G	1(0.42%)	0	0	0	0	0	0	0	1

## Sheet: H7N9.NS
Table S4.9. Haplotypes of NS sequences for H7N9.
Haplotype	Loci and bases		Abundance of haplotype in each sample
	523	707	S1	S2	S3	S4	S5	S6	S7	S8	Total
hap_1	T	G	310(73.63%)	0	0	0	0	0	86(62.77%)	0	396
hap_2	C	G	101(23.99%)	0	0	0	0	0	0	0	101
hap_3	T	T	10(2.38%)	0	0	0	0	0	51(37.23%)	0	61
